# Supplementary material for: BODIPY derivatives modified with carborane clusters: synthesis, characterization and DFT studies
Source: Royal Society of Chemistry journal article supplement (doi:10.1039/d3ob00255a), 2023-01-01
Supplement: d3ob00255a1.pdf [file d3ob00255a1.pdf]

## Supplementary information for

### BODIPY Derivatives Modified with Carborane Clusters: Synthesis, Characterization and DFT

#### Studies

Andrei V. Zaitsev<sup>a</sup>, Sergey S. Kiselev<sup>a</sup>, Alexander F. Smol'yakov<sup>a,b</sup>, Yury V. Fedorov<sup>a</sup> Elena G.

Kononova<sup>a</sup>, Yurii A. Borisov<sup>a</sup> and Valentina A. Ol'shevskaya<sup>a</sup>

<sup>a</sup>*A.N.Nesmeyanov Institute of Organoelement Compounds, Russian Academy of Sciences, Vavilova st. 28, bld. 1, Moscow 119991, Russian Federation*

<sup>b</sup>*Plekhanov Russian University of Economics, Stremyanny per. 36, Moscow, 117997, Russian Federation*

*\*corresponding author, e-mail:olshevsk@ineos.ac.ru*

#### Table of Contents

|                                                                      | page |
|----------------------------------------------------------------------|------|
| <b>Figure S1.</b> <sup>1</sup> H NMR spectrum of compound <b>4</b>   | S2   |
| <b>Figure S2.</b> <sup>11</sup> B NMR spectrum of compound <b>4</b>  | S2   |
| <b>Figure S3.</b> <sup>13</sup> C NMR spectrum of compound <b>4</b>  | S3   |
| <b>Figure S4.</b> <sup>19</sup> F NMR spectrum of compound <b>4</b>  | S3   |
| <b>Figure S5.</b> Mass spectrum of compound <b>4</b>                 | S4   |
| <b>Figure S6.</b> <sup>1</sup> H NMR spectrum of compound <b>5</b>   | S4   |
| <b>Figure S7.</b> <sup>11</sup> B NMR spectrum of compound <b>5</b>  | S5   |
| <b>Figure S8.</b> <sup>13</sup> C NMR spectrum of compound <b>5</b>  | S5   |
| <b>Figure S9.</b> <sup>19</sup> F NMR spectrum of compound <b>5</b>  | S5   |
| <b>Figure S10.</b> Mass spectrum of compound <b>5</b>                | S6   |
| <b>Figure S11.</b> <sup>1</sup> H NMR spectrum of compound <b>7</b>  | S6   |
| <b>Figure S12.</b> <sup>11</sup> B NMR spectrum of compound <b>7</b> | S7   |
| <b>Figure S13.</b> <sup>13</sup> C NMR spectrum of compound <b>7</b> | S7   |
| <b>Figure S14.</b> <sup>19</sup> F NMR spectrum of compound <b>7</b> | S8   |
| <b>Figure S15.</b> Mass spectrum of compound <b>7</b>                | S8   |
| <b>Figure S16.</b> <sup>1</sup> H NMR spectrum of compound <b>8</b>  | S9   |
| <b>Figure S17.</b> <sup>11</sup> B NMR spectrum of compound <b>8</b> | S9   |
| <b>Figure S18.</b> <sup>13</sup> C NMR spectrum of compound <b>8</b> | S9   |
| <b>Figure S19.</b> <sup>19</sup> F NMR spectrum of compound <b>8</b> | S10  |
| <b>Figure S20.</b> Mass spectrum of compound <b>8</b>                | S10  |
| <b>Figure S21.</b> <sup>1</sup> H NMR spectrum of compound <b>9</b>  | S11  |
| <b>Figure S22.</b> <sup>11</sup> B NMR spectrum of compound <b>9</b> | S11  |
| <b>Figure S23.</b> <sup>13</sup> C NMR spectrum of compound <b>9</b> | S11  |

|                                                                                                                 |     |
|-----------------------------------------------------------------------------------------------------------------|-----|
| <b>Figure S24.</b> $^{19}\text{F}$ NMR spectrum of compound <b>9</b>                                            | S12 |
| <b>Figure S25.</b> Mass spectrum of compound <b>9</b>                                                           | S12 |
| <b>Figure S26.</b> $^1\text{H}$ NMR spectrum of compound <b>10</b>                                              | S13 |
| <b>Figure S27.</b> $^{11}\text{B}$ NMR spectrum of compound <b>10</b>                                           | S13 |
| <b>Figure S28.</b> $^{13}\text{C}$ NMR spectrum of compound <b>10</b>                                           | S13 |
| <b>Figure S29.</b> $^{19}\text{F}$ NMR spectrum of compound <b>10</b>                                           | S14 |
| <b>Figure S30.</b> Mass spectrum of compound <b>10</b>                                                          | S14 |
| <b>Figure S31.</b> Fluorescence spectra of compound <b>4</b> in air-saturated and degassed acetone              | S15 |
| <b>Figure S32.</b> Fluorescence spectra of compound <b>7</b> in air-saturated and degassed acetone              | S15 |
| <b>Table S1.</b> Comparison of the experimental and theoretical interatomic distances for molecule <b>4, 8.</b> | S16 |

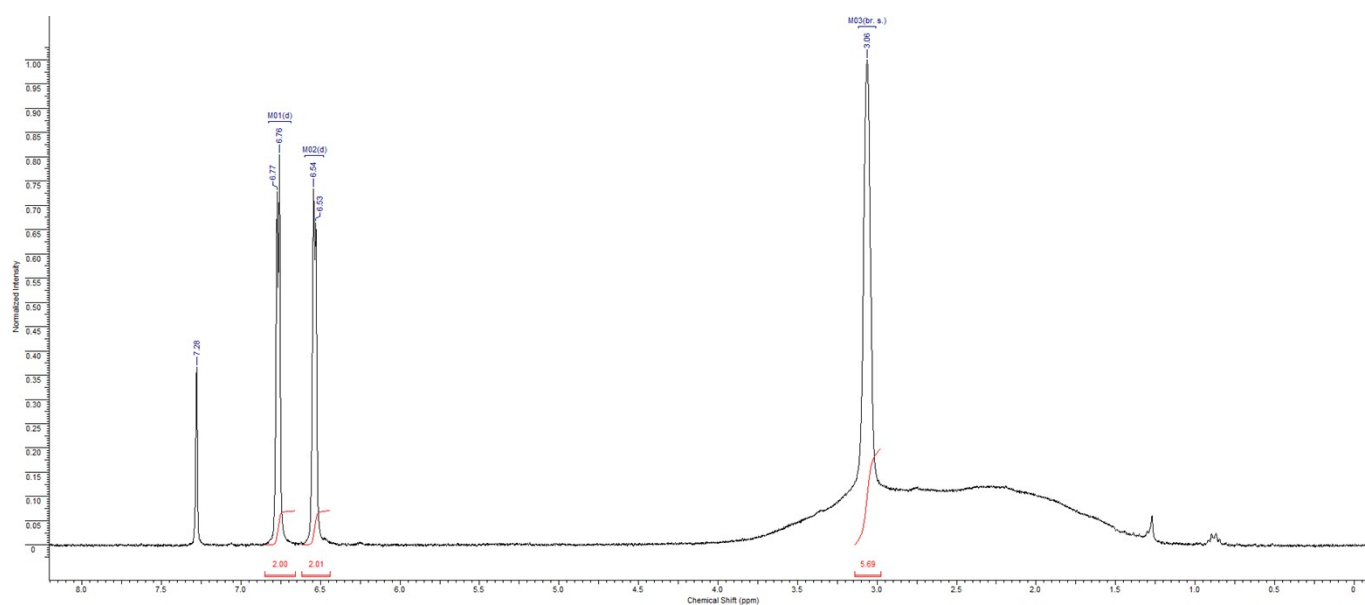

Figure S1.  $^1\text{H}$  NMR (400 MHz,  $\text{CDCl}_3$ ) spectrum of compound **4**.

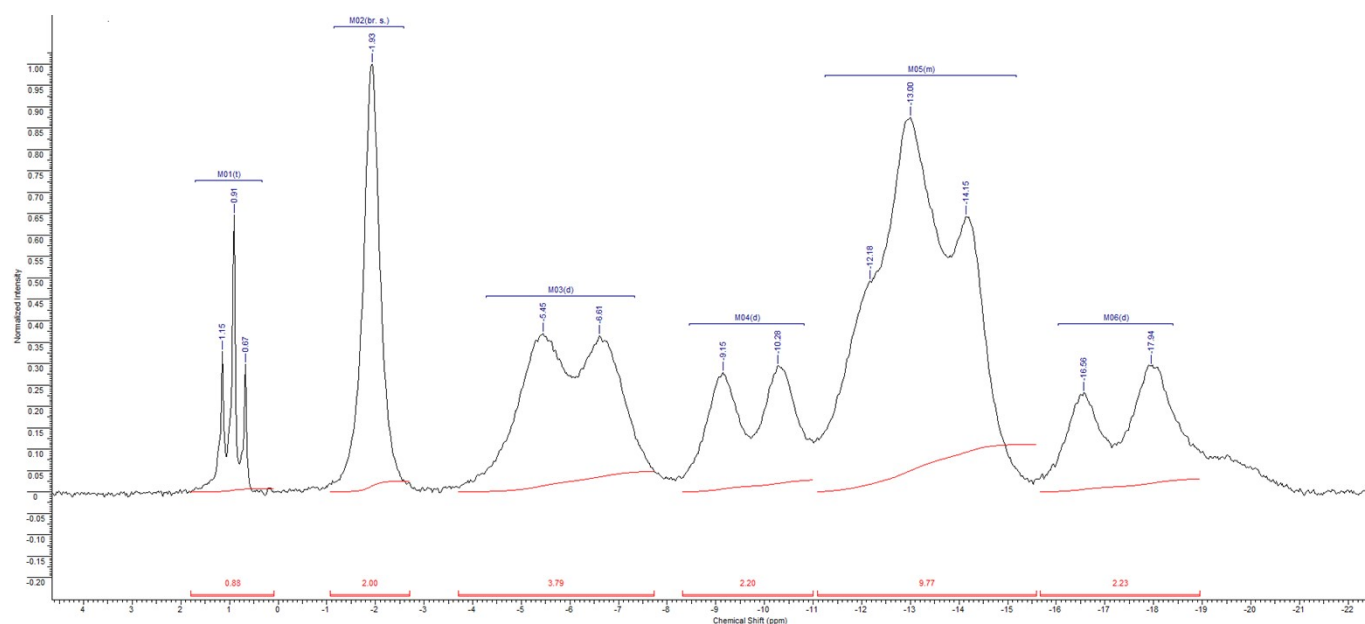

Figure S2.  $^{11}\text{B}$  NMR (128 MHz,  $\text{CDCl}_3$ ) spectrum of compound **4**

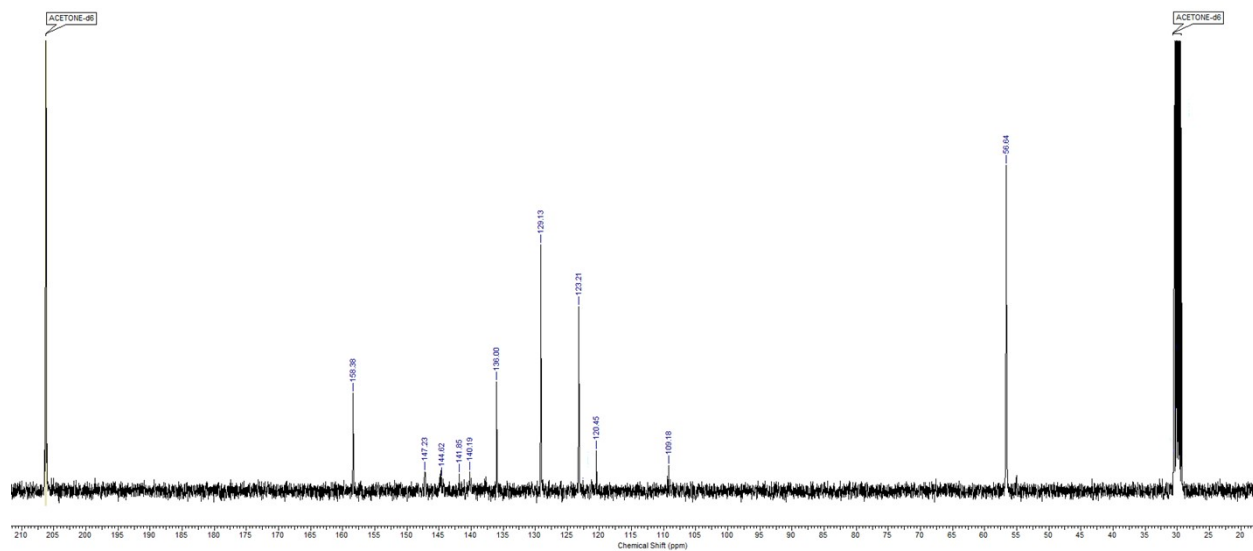

Figure S3.  $^{13}\text{C}$  NMR (100.6 MHz,  $(\text{CD}_3)_2\text{CO}$ ) spectrum of compound 4

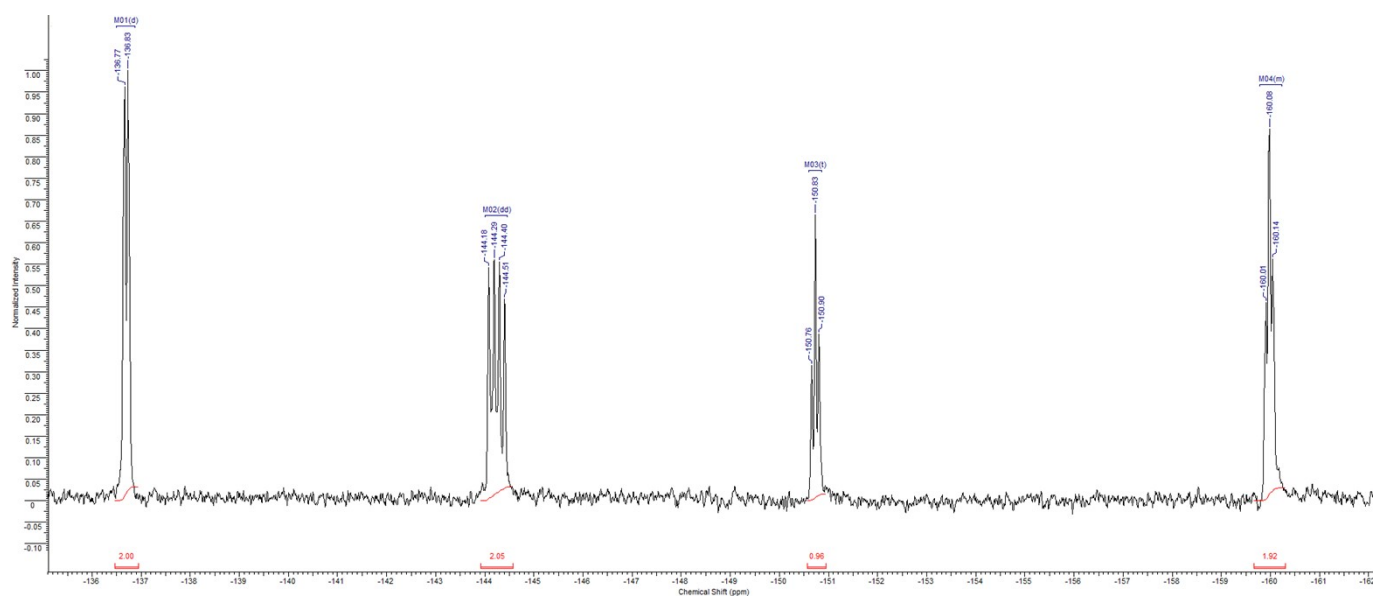

Figure S4.  $^{19}\text{F}$  NMR (282 MHz,  $\text{CDCl}_3$ ) spectrum of compound 4

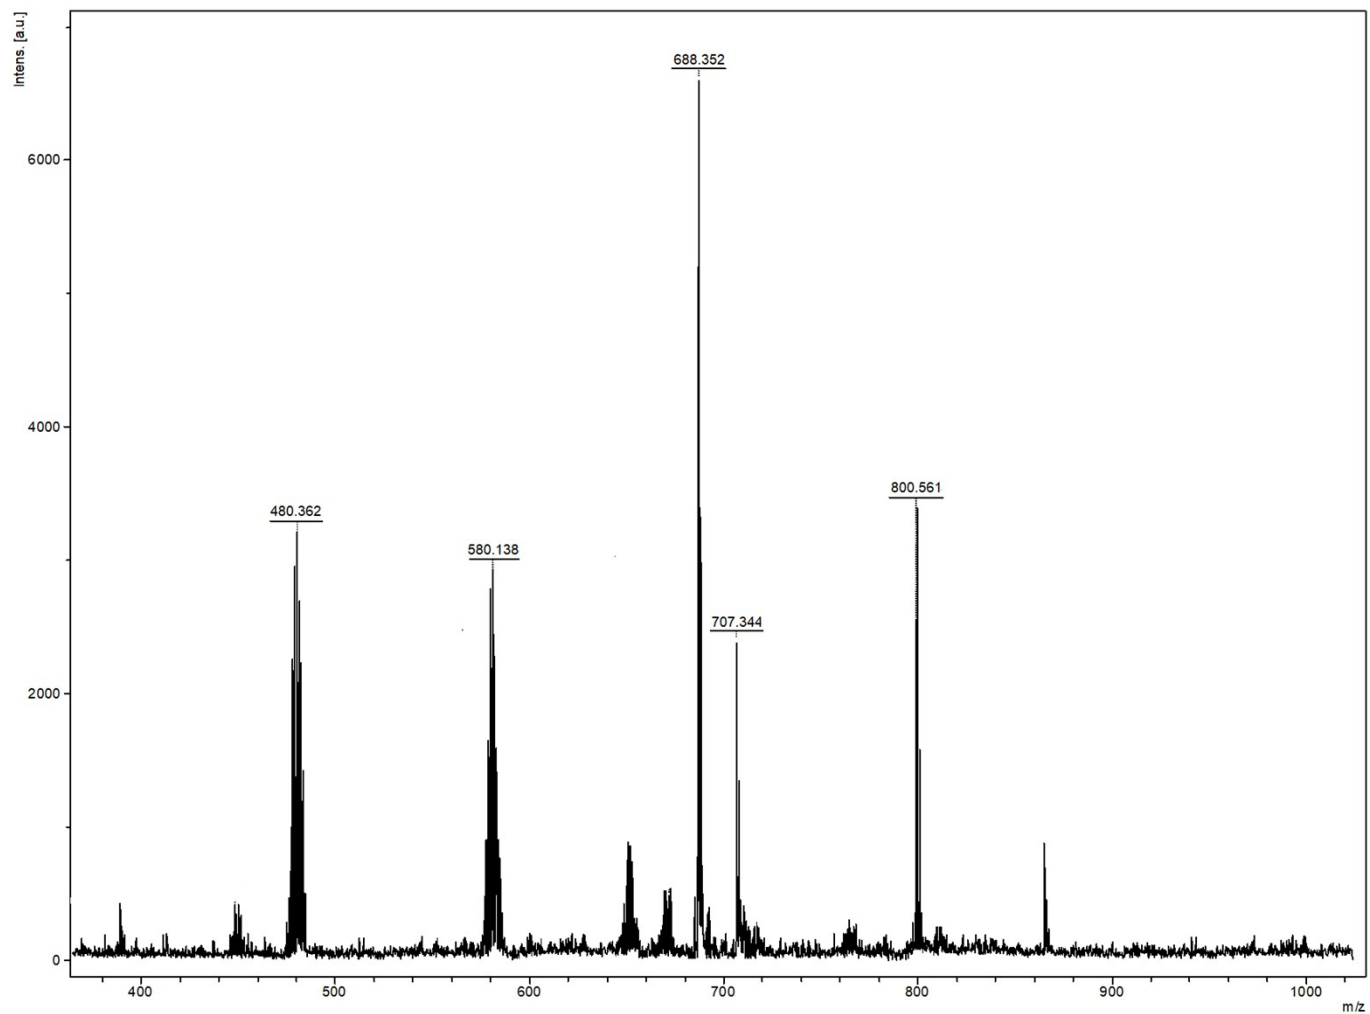

Figure S5. Mass spectrum (MALDI) of compound 4

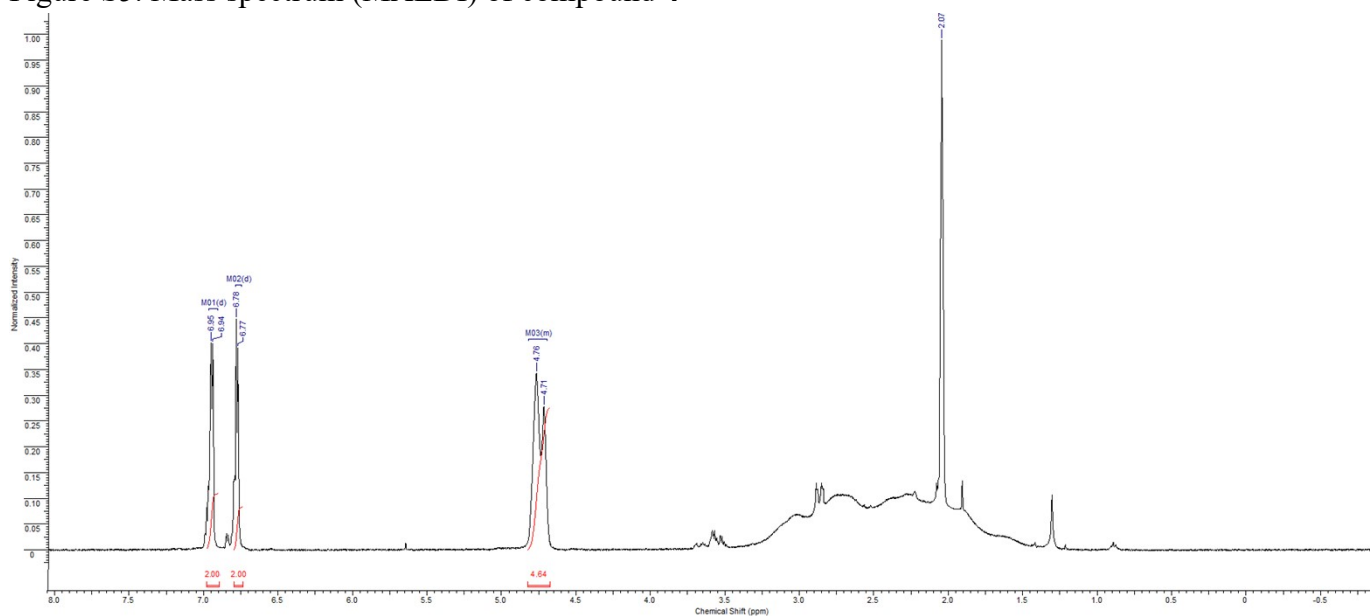

Figure S6.  $^1\text{H}$  NMR (400 MHz,  $(\text{CD}_3)_2\text{CO}$ ) spectrum of compound 5

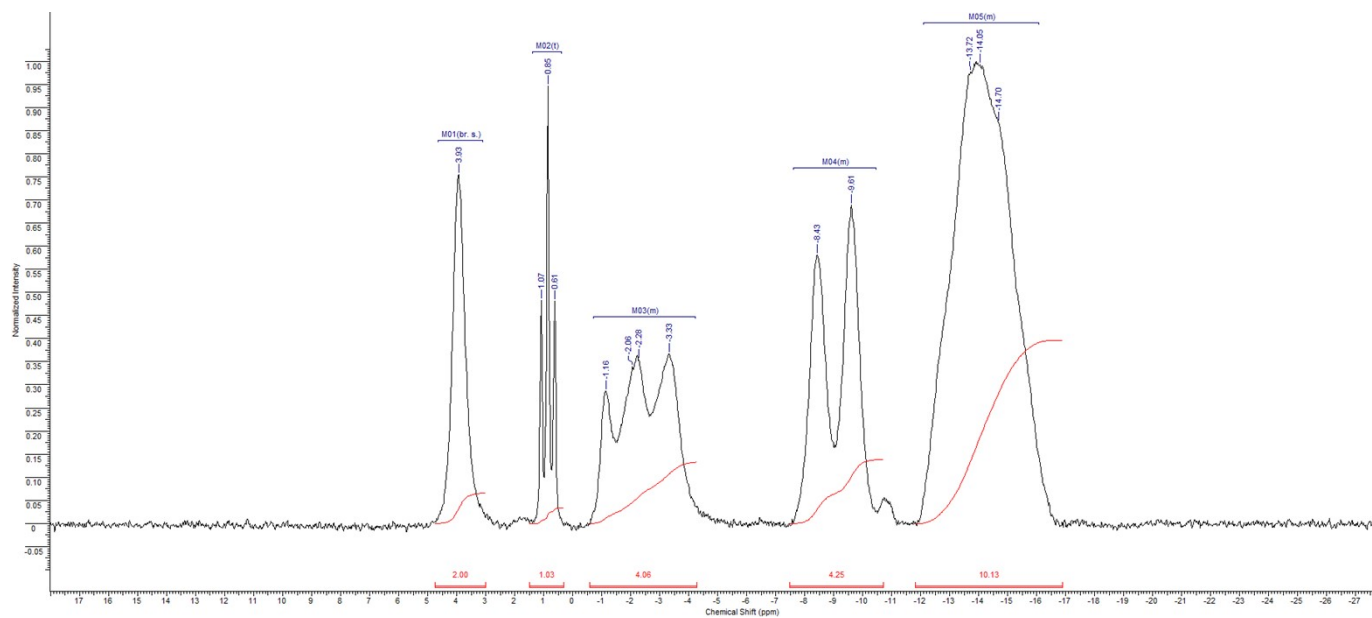

Figure S7.  $^{11}\text{B}$  NMR (128 MHz,  $(\text{CD}_3)_2\text{CO}$ ) spectrum of compound **5**

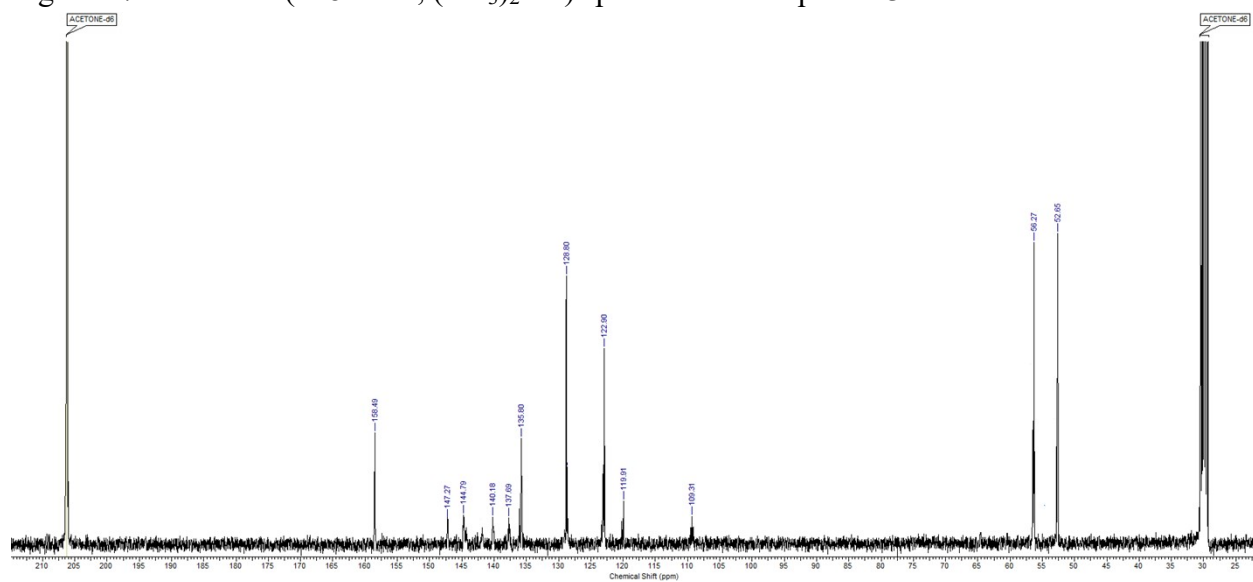

Figure S8.  $^{13}\text{C}$  NMR (100.6 MHz,  $(\text{CD}_3)_2\text{CO}$ ) spectrum of compound **5**

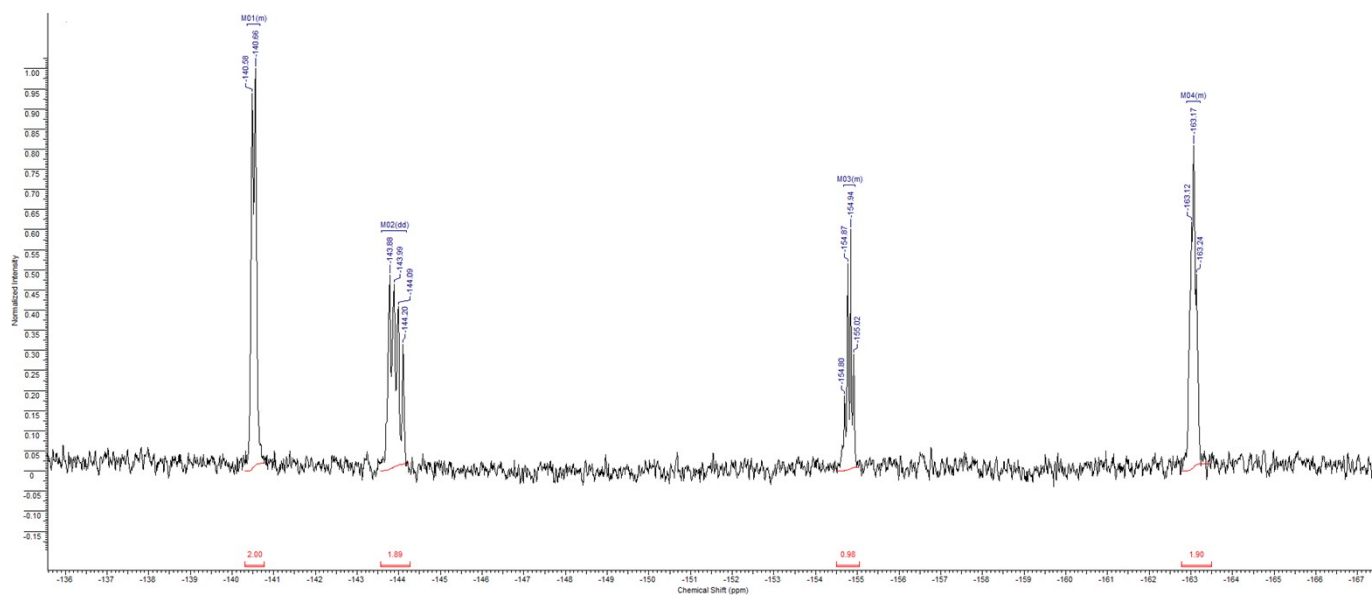

Figure S9.  $^{19}\text{F}$  NMR (282 MHz,  $(\text{CD}_3)_2\text{CO}$ ) spectrum of compound **5**

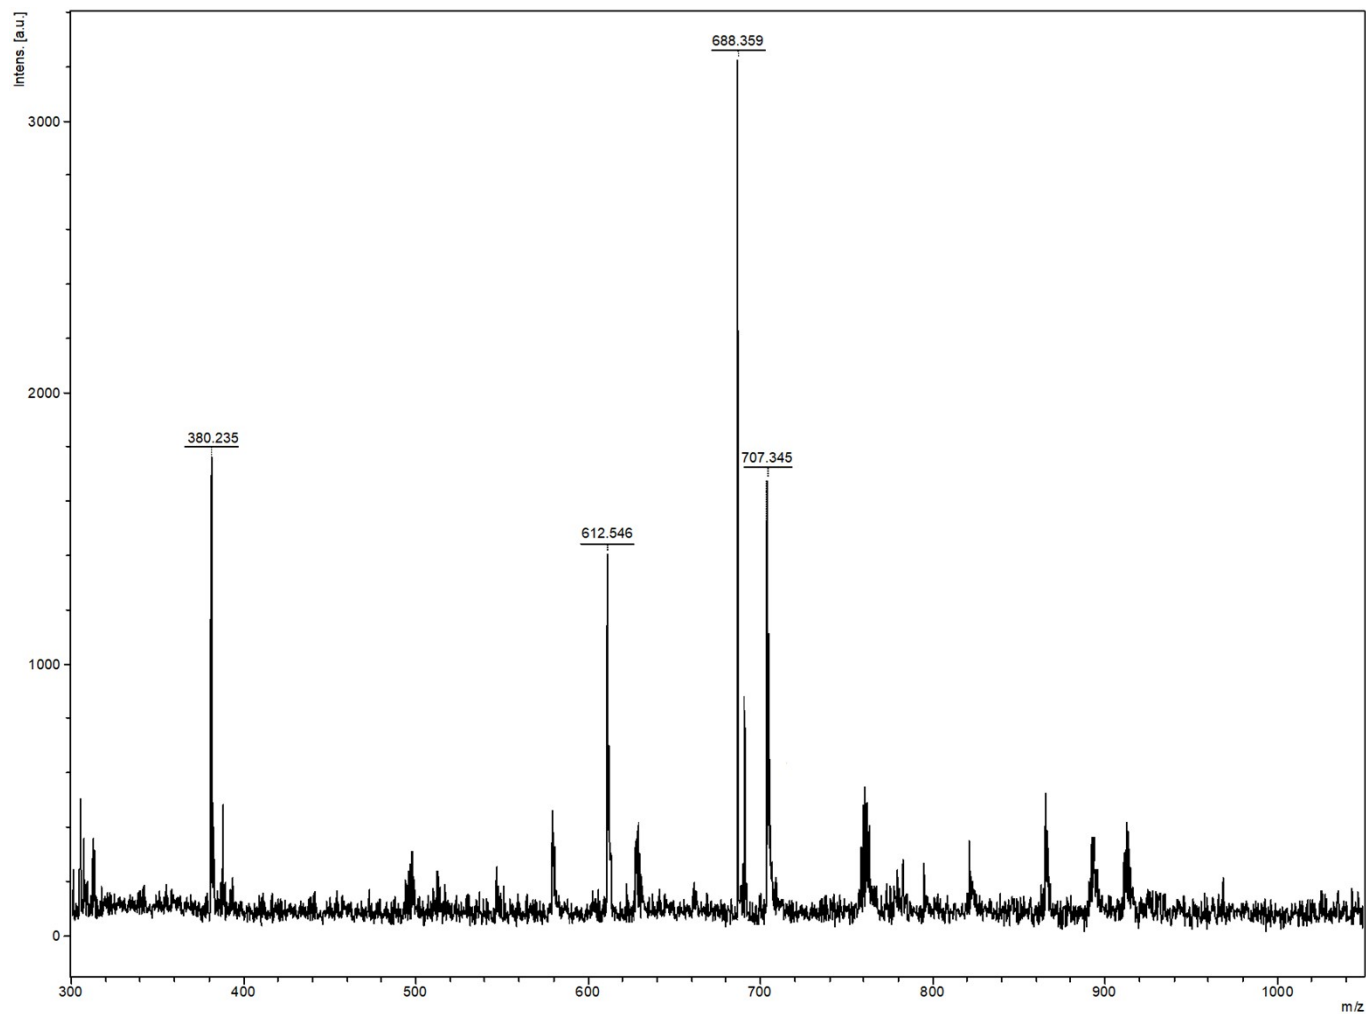

Figure S10. Mass spectrum (MALDI) of compound 5

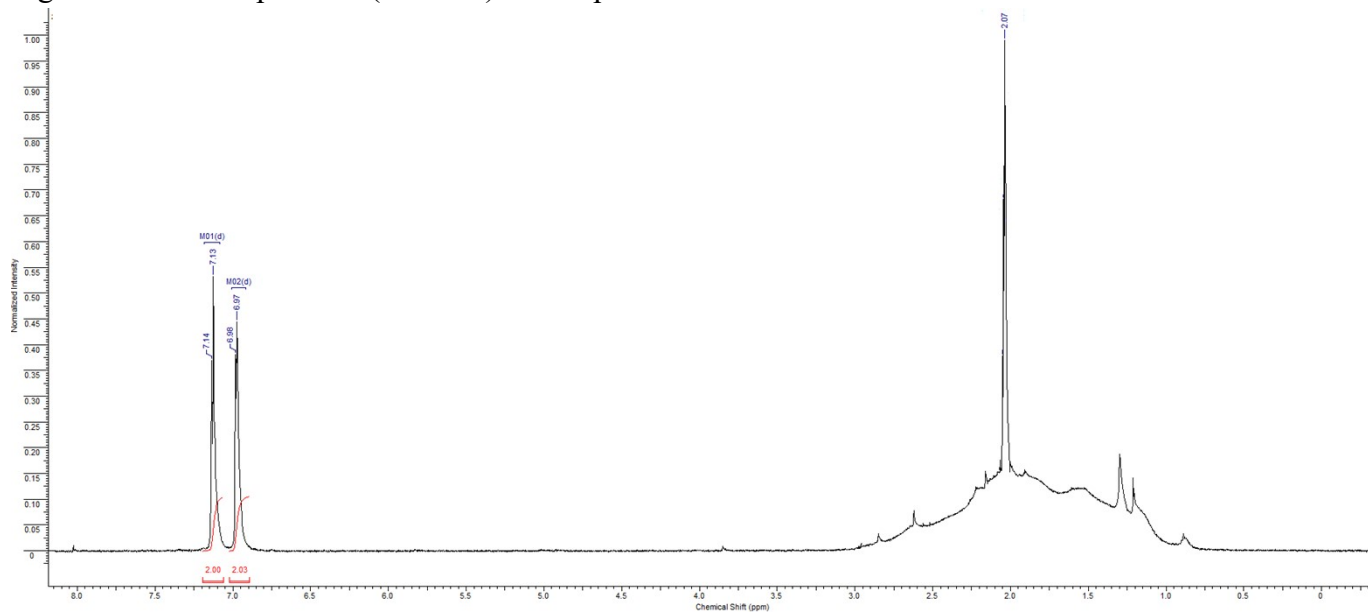

Figure S11. <sup>1</sup>H NMR (400 MHz, (CD<sub>3</sub>)<sub>2</sub>CO) spectrum of compound 7

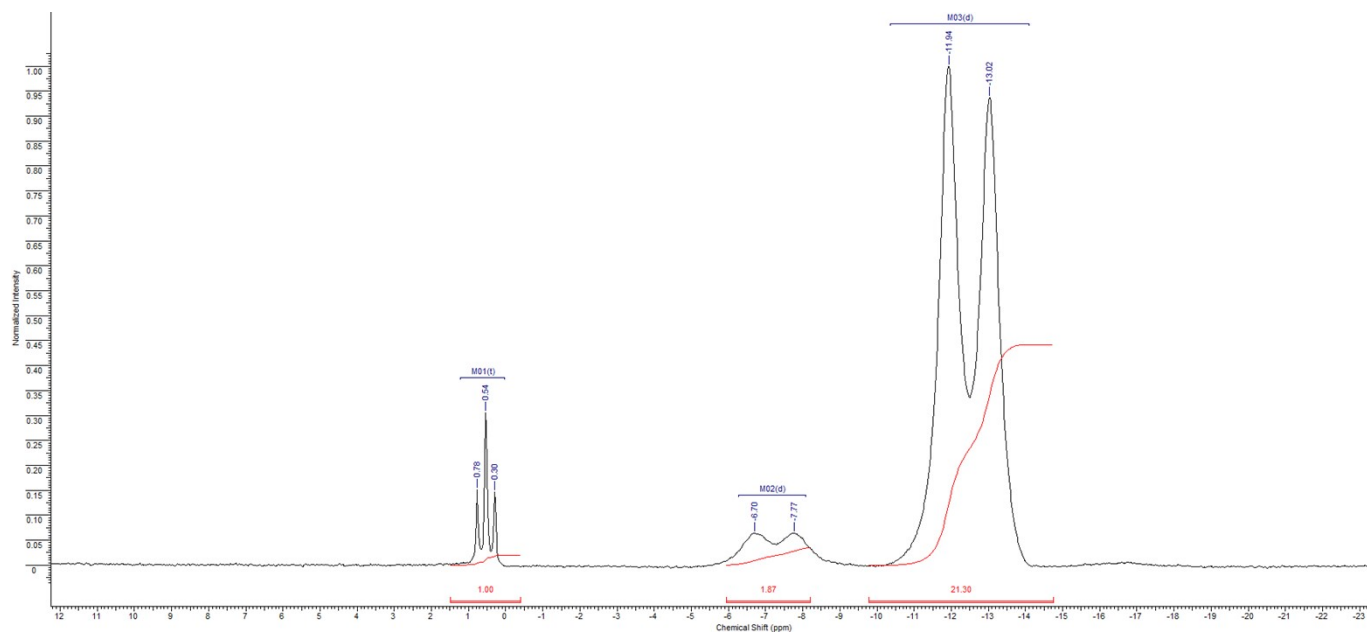

Figure S12.  $^{11}\text{B}$  NMR (128 MHz,  $(\text{CD}_3)_2\text{CO}$ ) spectrum of compound **7**

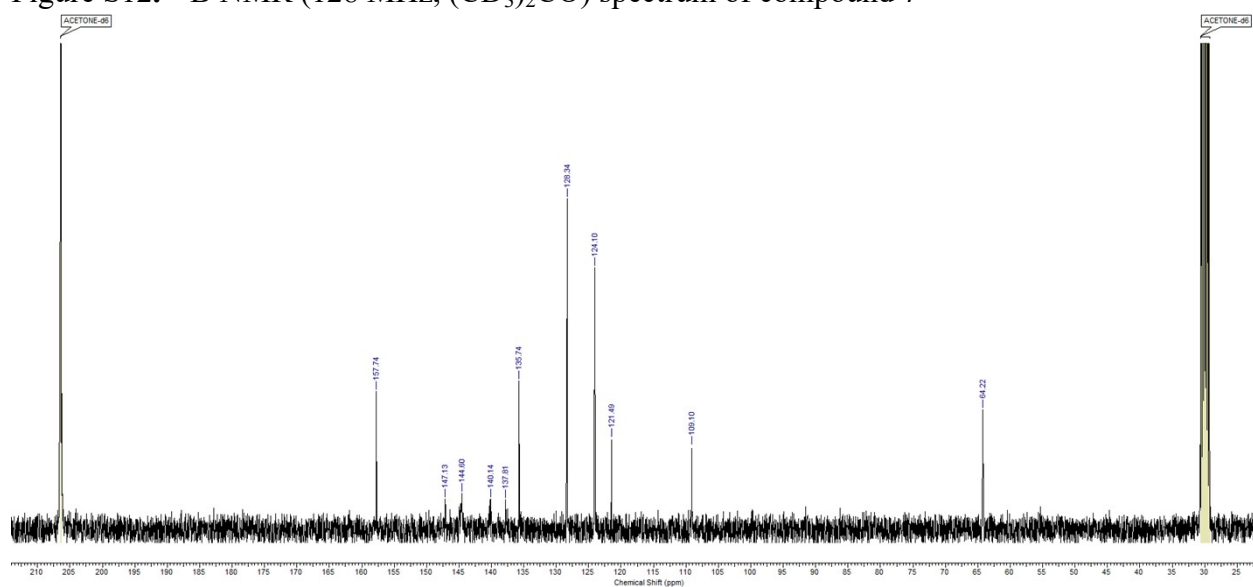

Figure S13.  $^{13}\text{C}$  NMR (100.6 MHz,  $(\text{CD}_3)_2\text{CO}$ ) spectrum of compound **7**

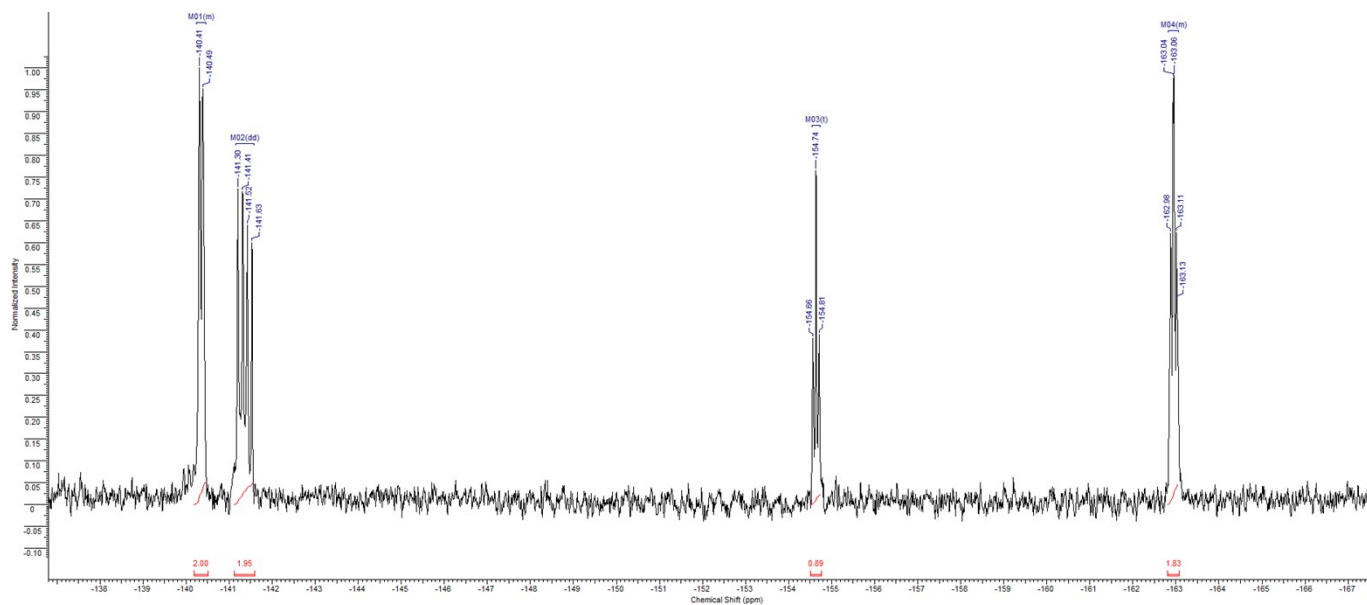

Figure S14.  $^{19}\text{F}$  NMR (282 MHz,  $(\text{CD}_3)_2\text{CO}$ ) spectrum of compound 7

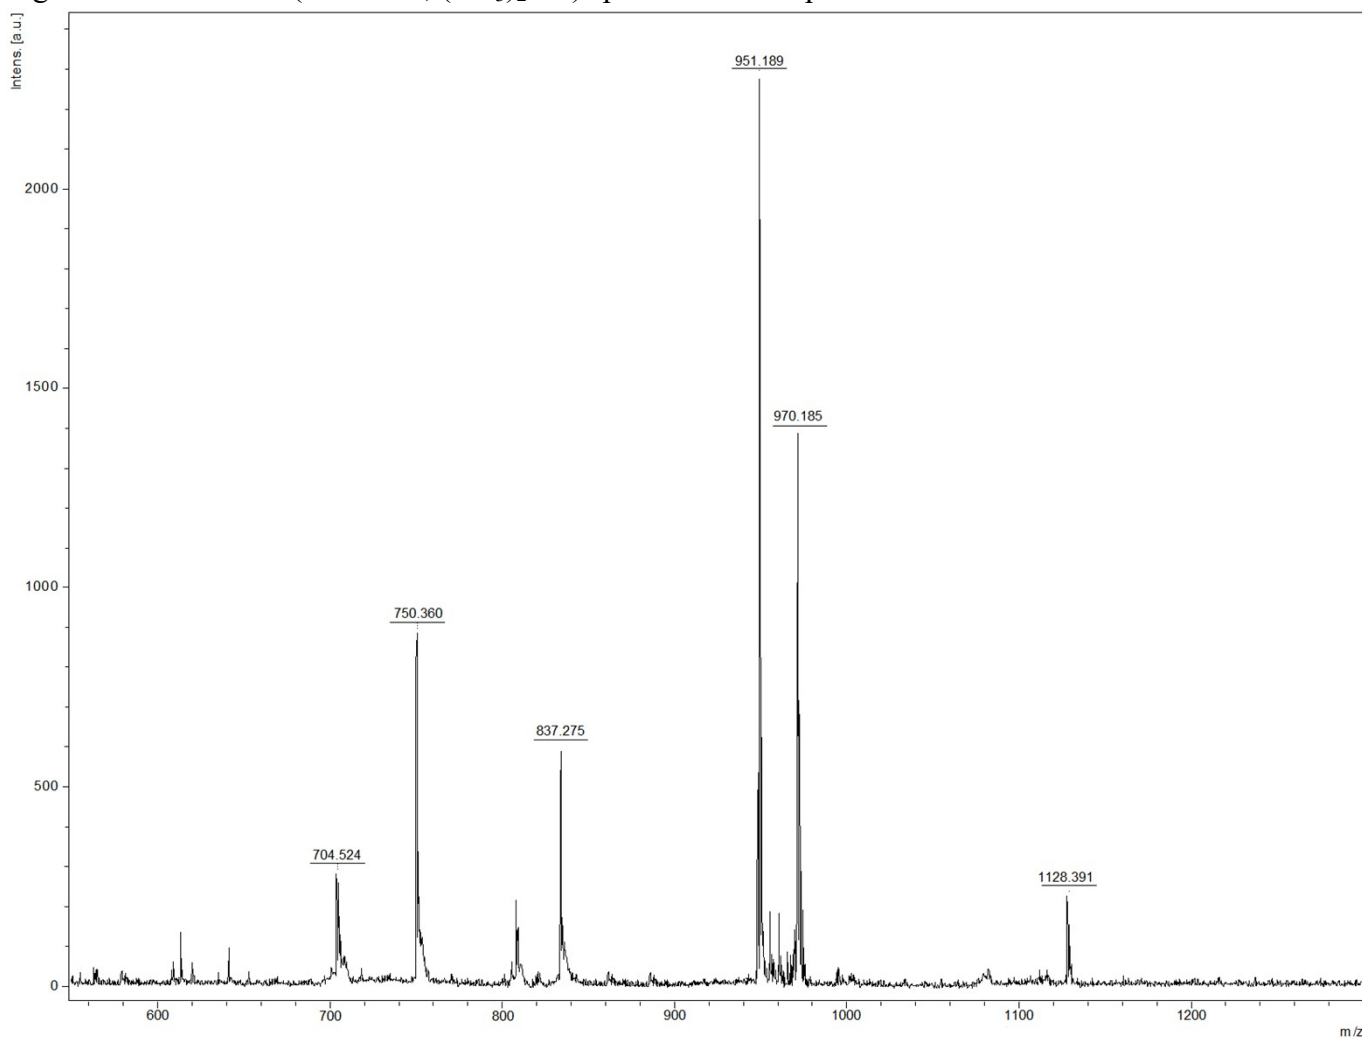

Figure S15. Mass spectrum (MALDI) of compound 7



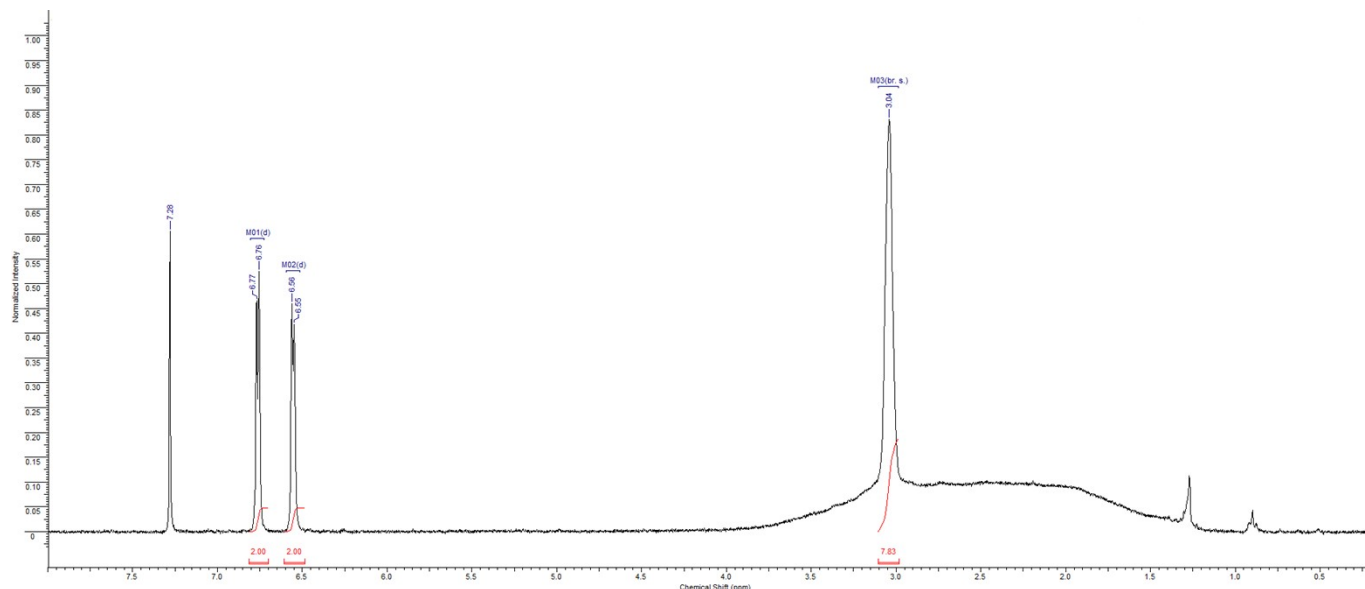

Figure S16.  $^1\text{H}$  NMR (400 MHz,  $\text{CDCl}_3$ ) spectrum of compound **8**

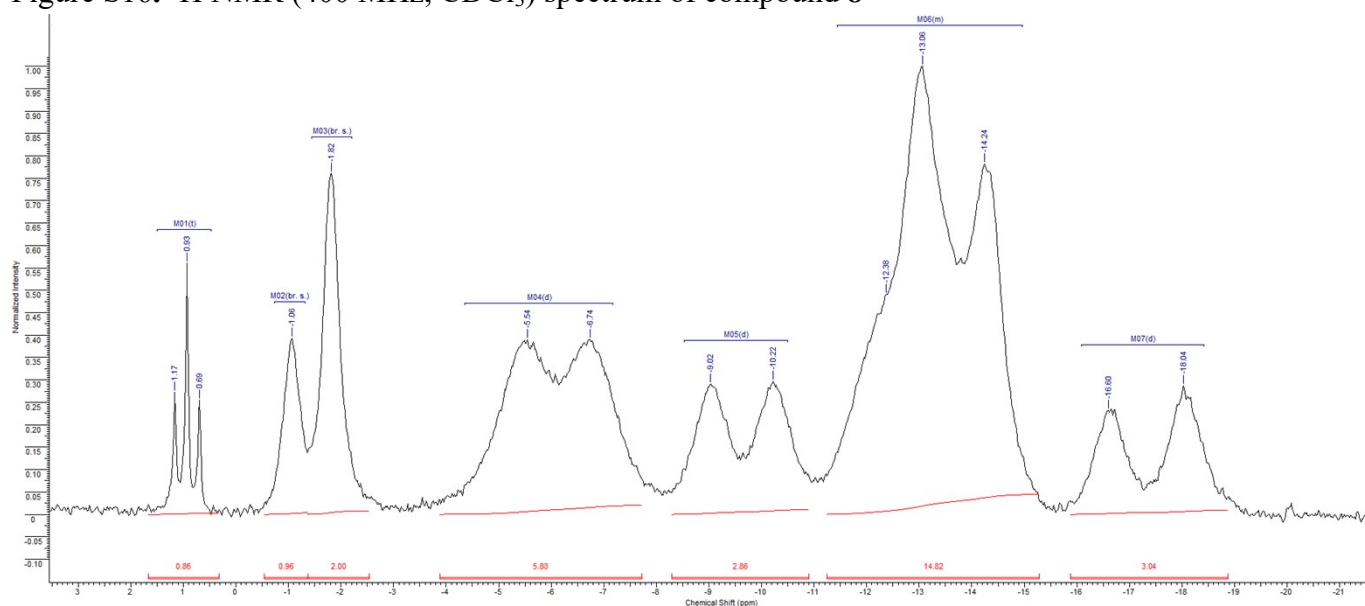

Figure S17.  $^{11}\text{B}$  NMR (128 MHz,  $\text{CDCl}_3$ ) spectrum of compound **8**

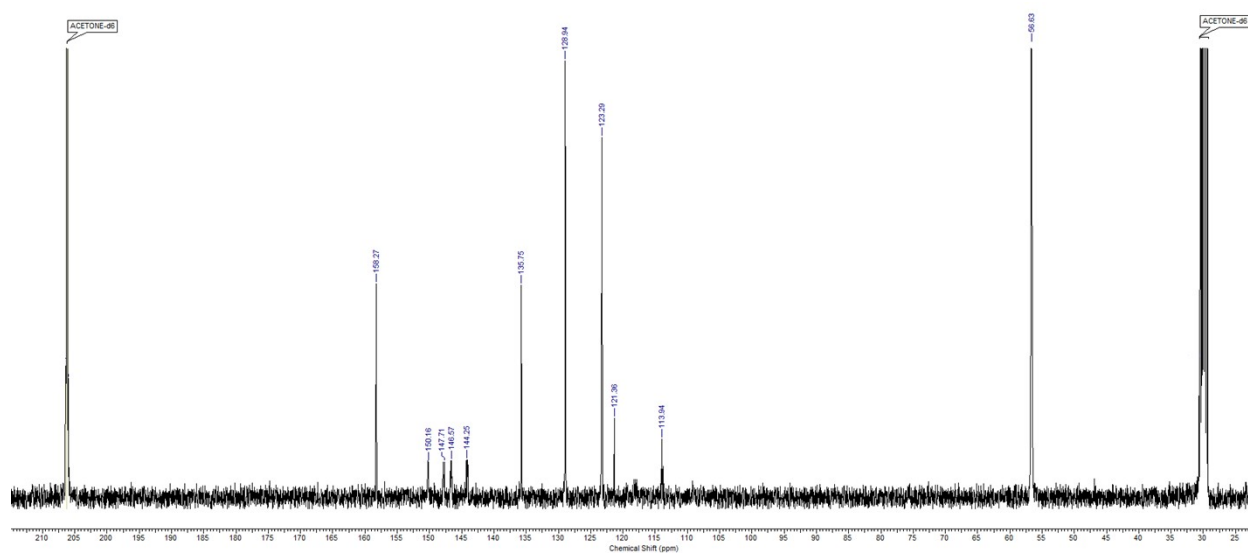

Figure S18.  $^{13}\text{C}$  NMR (100.6 MHz,  $(\text{CD}_3)_2\text{CO}$ ) spectrum of compound **8**

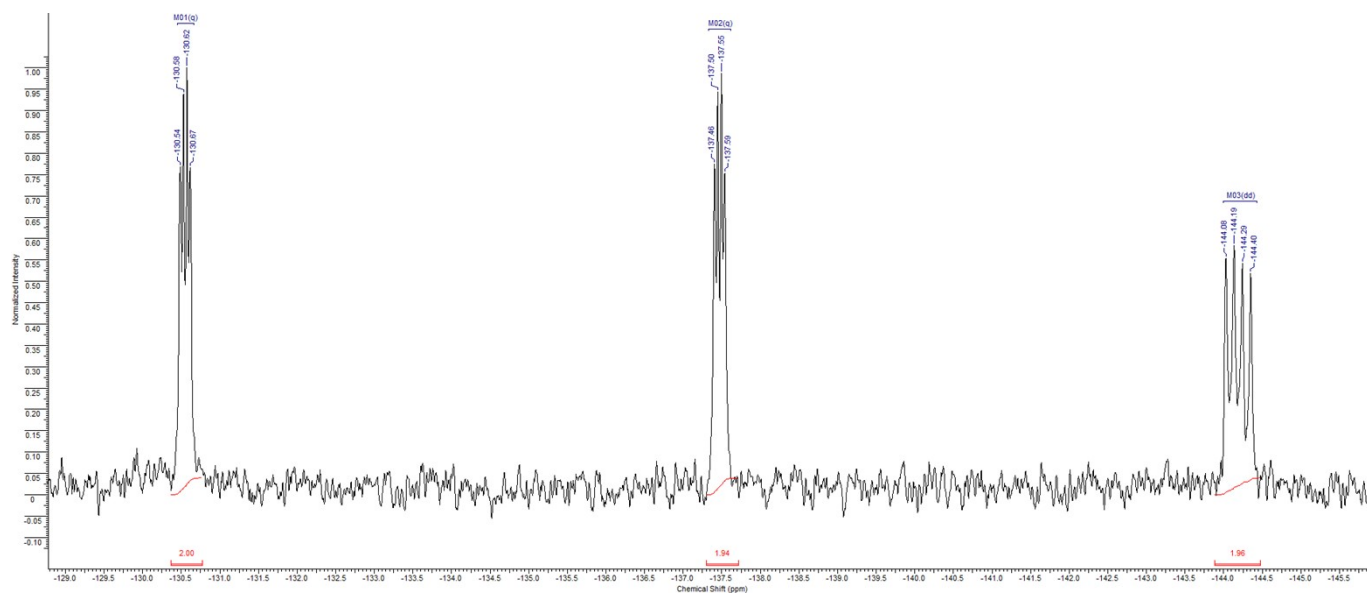

Figure S19.  $^{19}\text{F}$  NMR (282 MHz,  $\text{CDCl}_3$ ) spectrum of compound **8**

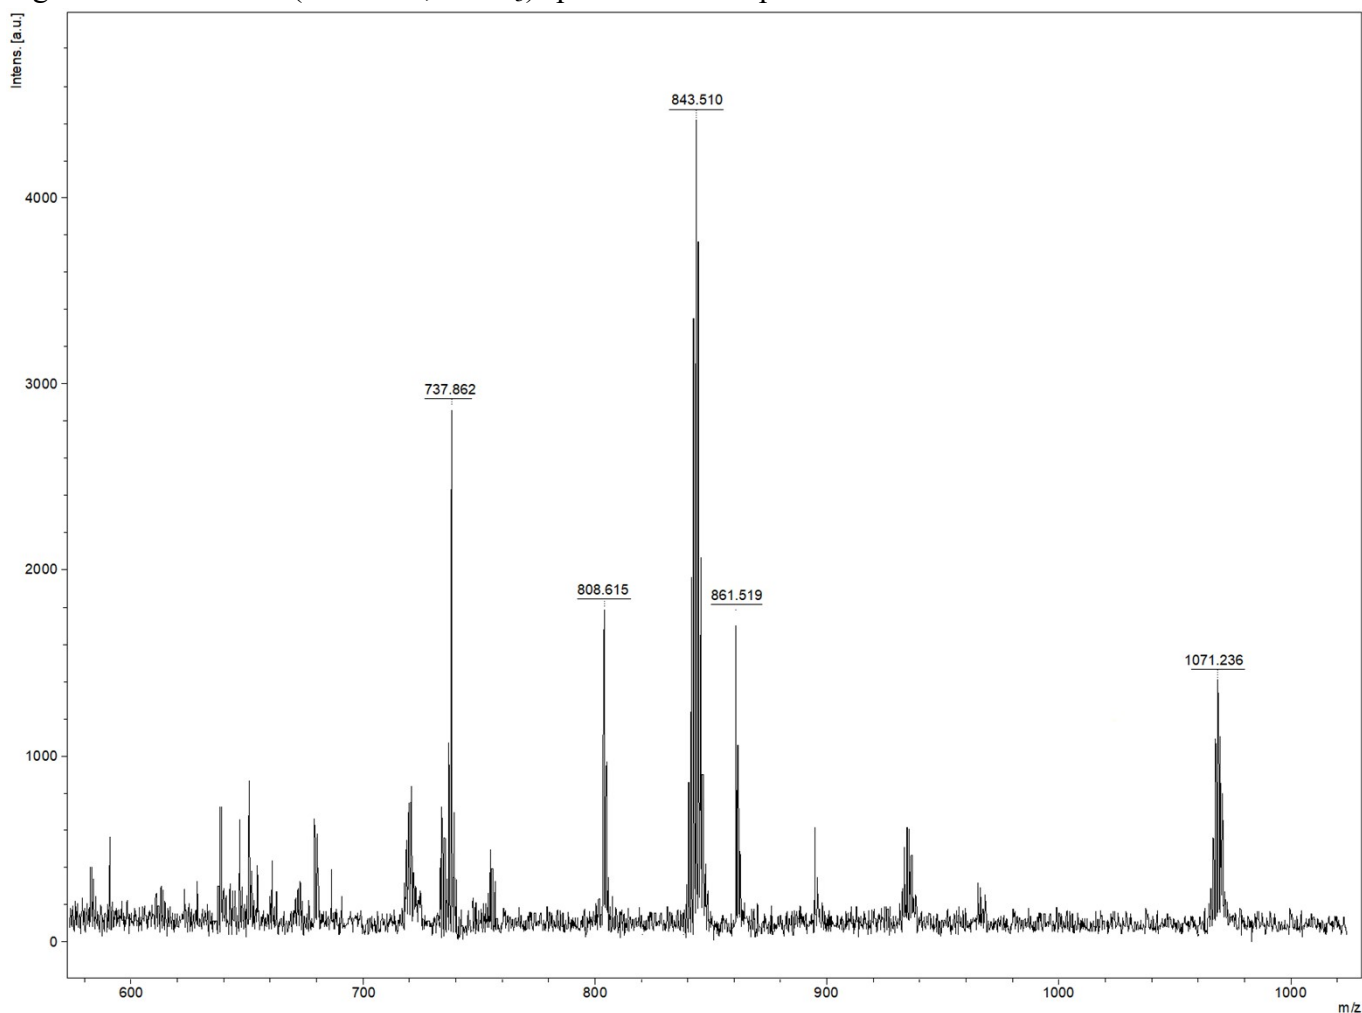

Figure S20. Mass spectrum (MALDI) of compound **8**

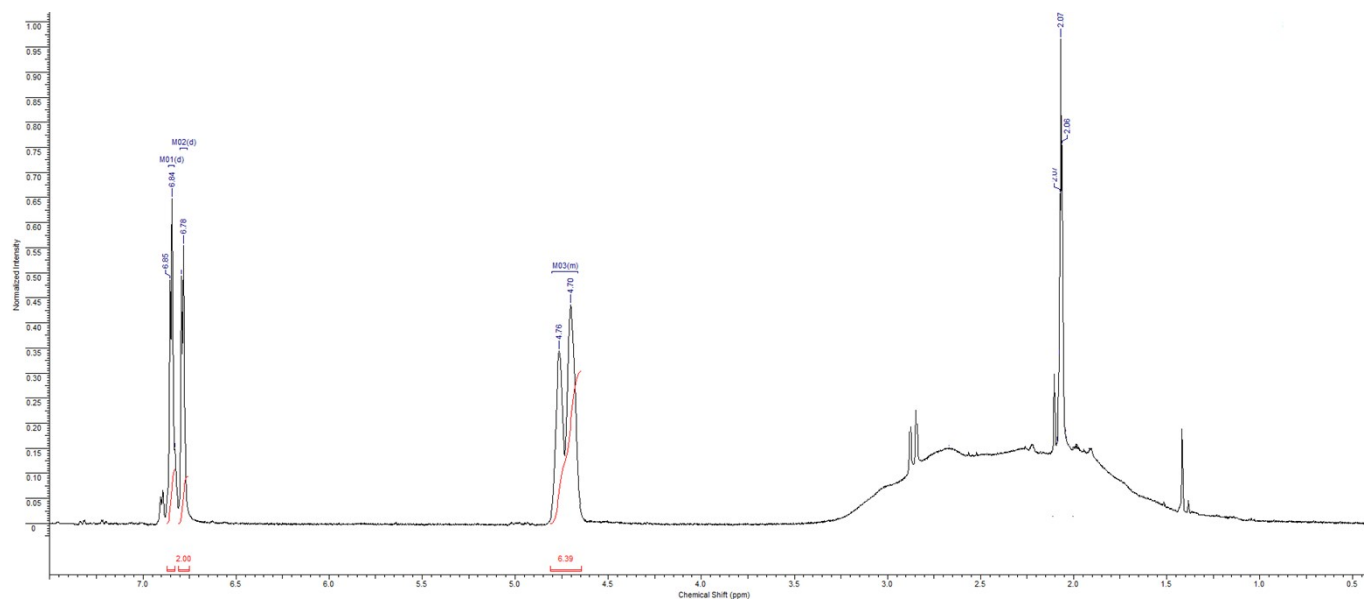

Figure S21.  $^1\text{H}$  NMR (400 MHz,  $(\text{CD}_3)_2\text{CO}$ ) spectrum of compound **9**

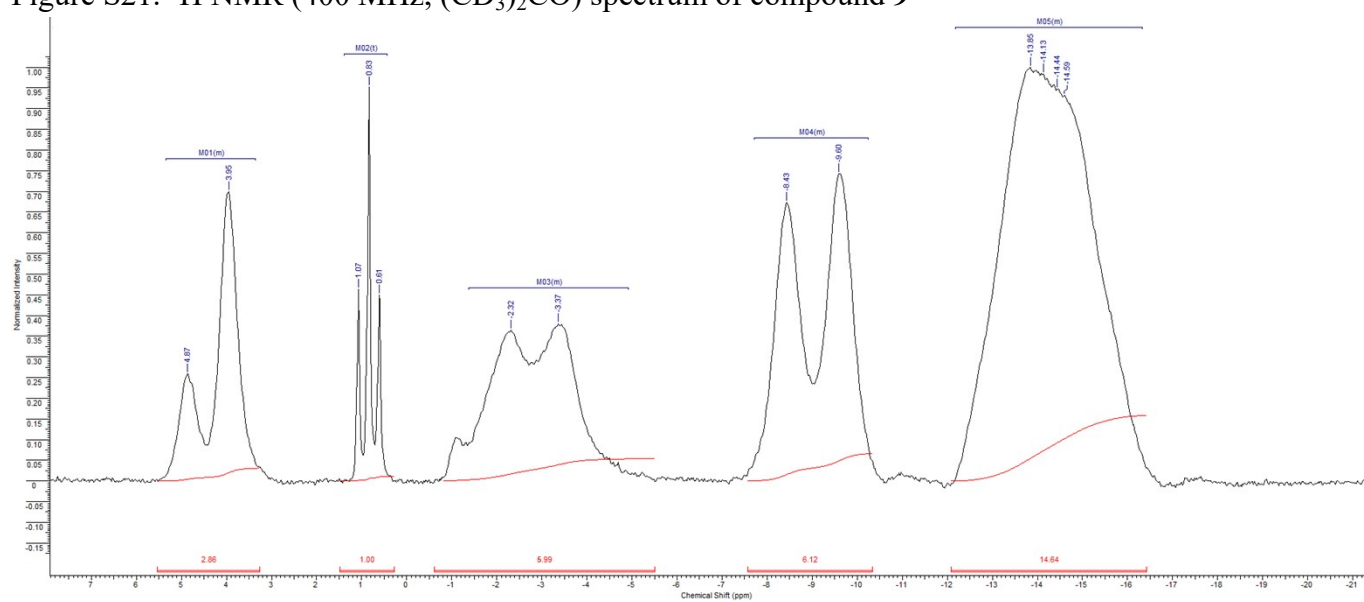

Figure S22.  $^{11}\text{B}$  NMR (128 MHz,  $(\text{CD}_3)_2\text{CO}$ ) spectrum of compound **9**

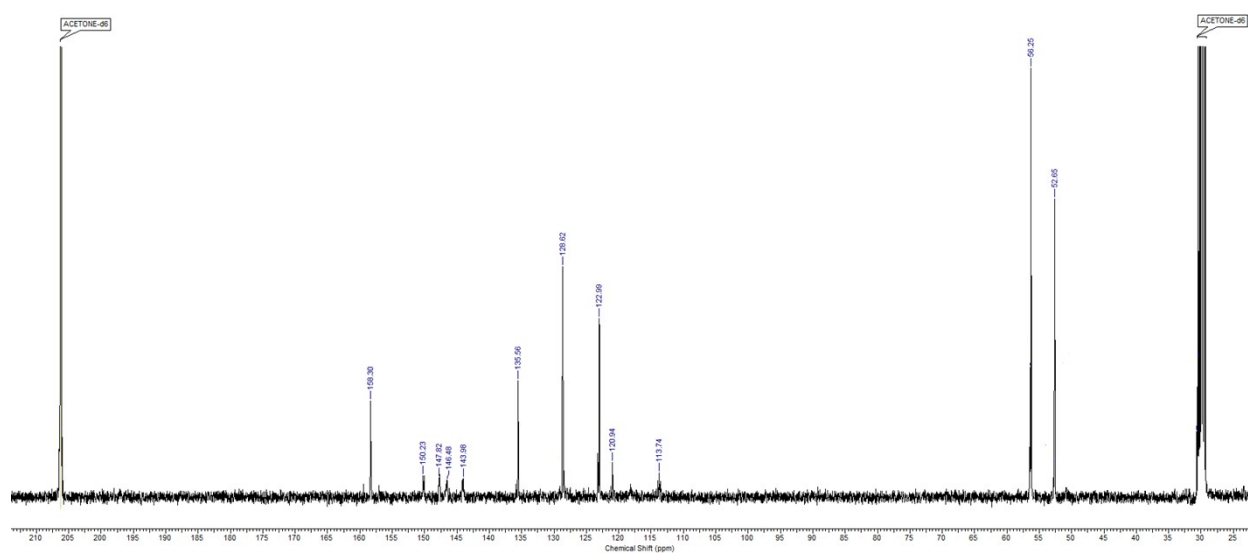

Figure S23.  $^{13}\text{C}$  NMR (100.6 MHz,  $(\text{CD}_3)_2\text{CO}$ ) spectrum of compound **9**

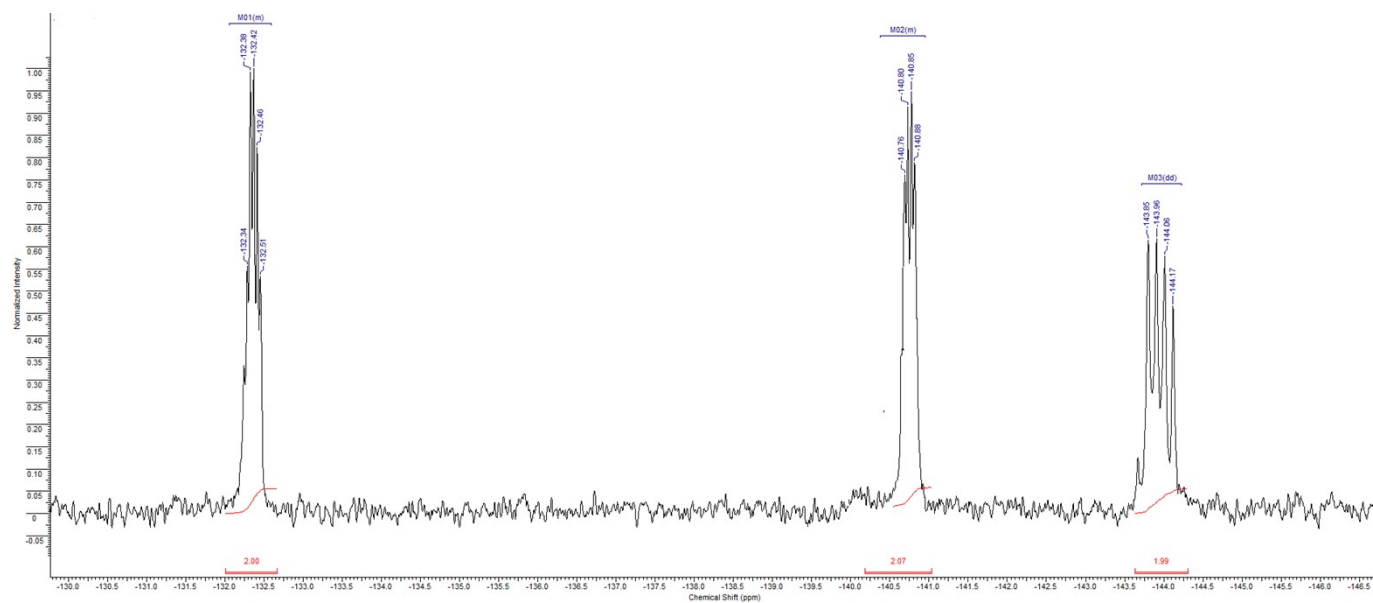

Figure S24.  $^{19}\text{F}$  NMR (282 MHz,  $(\text{CD}_3)_2\text{CO}$ ) spectrum of compound **9**

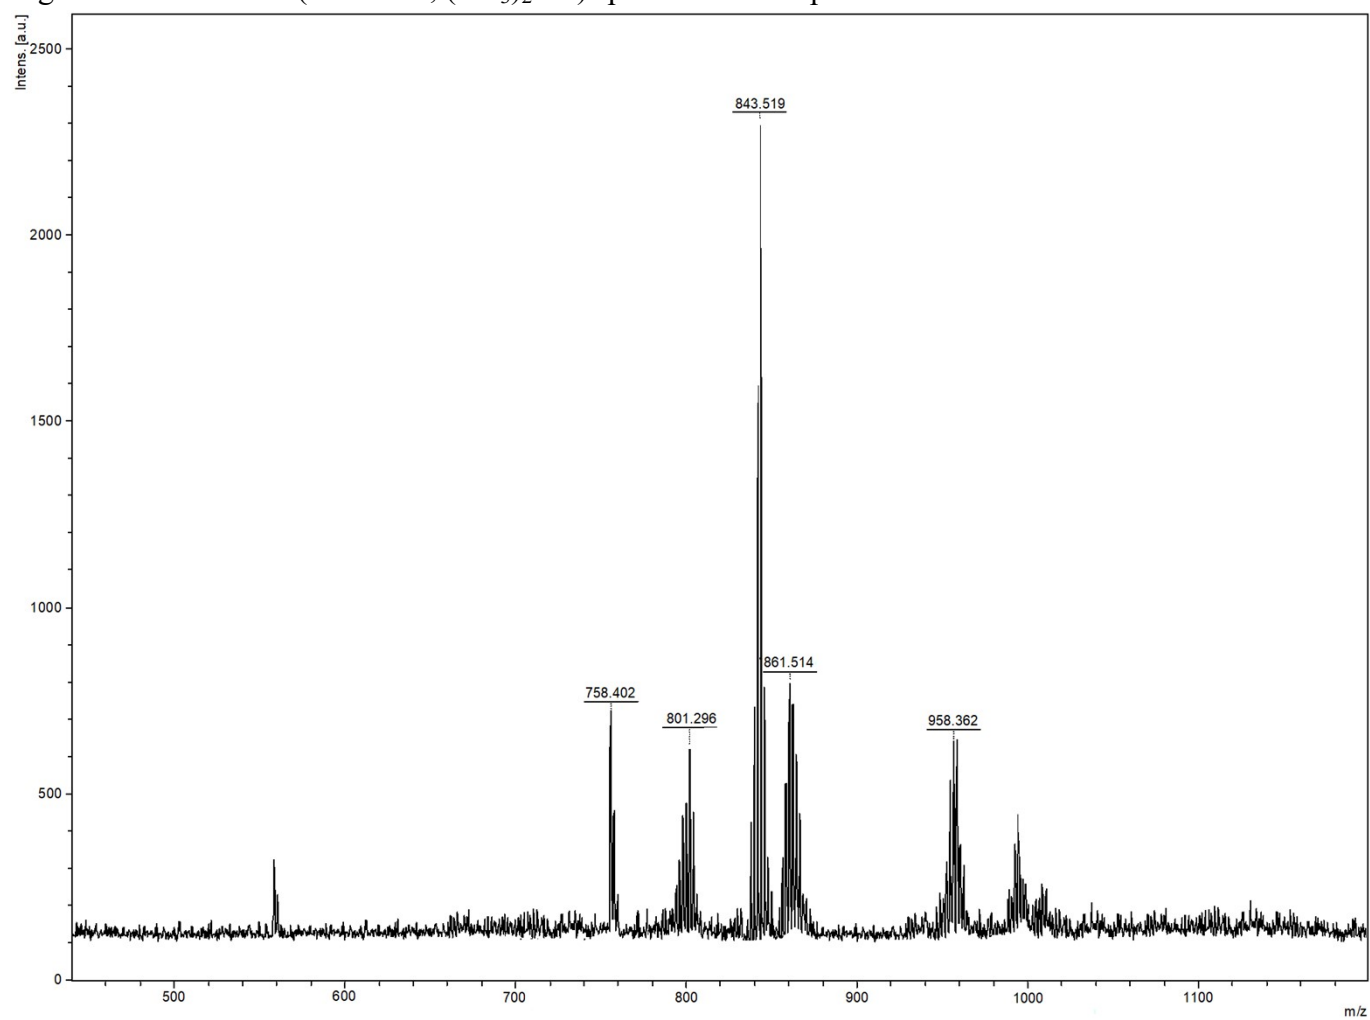

Figure S25. Mass spectrum (MALDI) of compound **9**

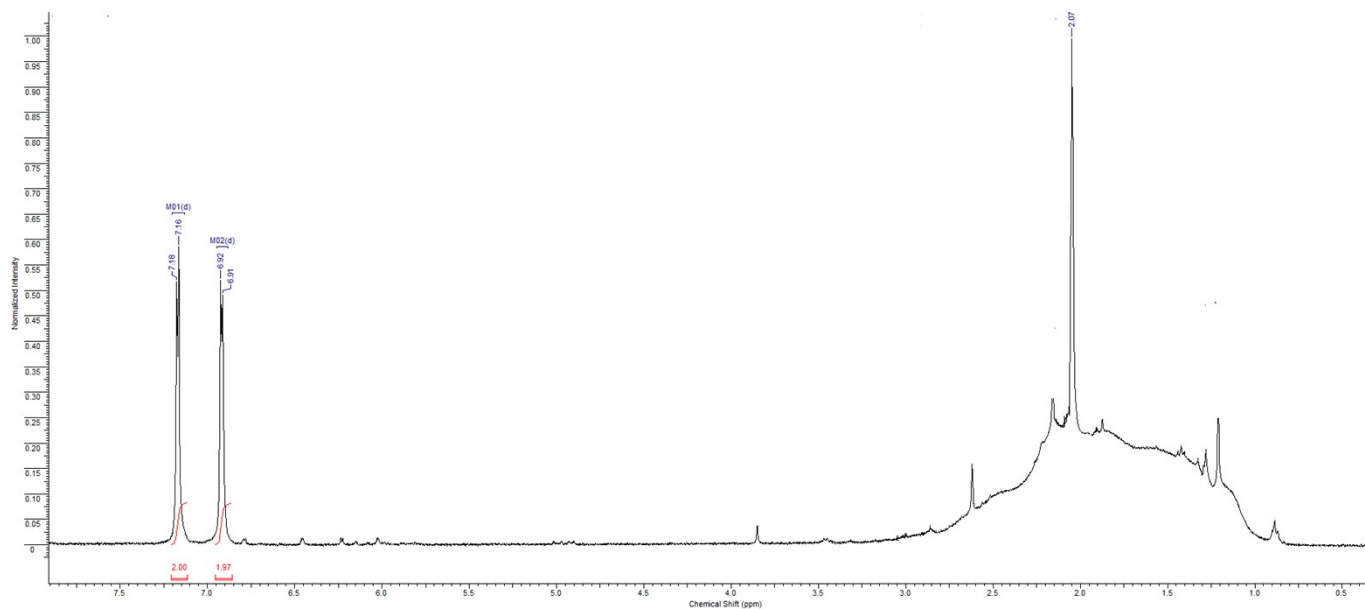

Figure S26.  $^1\text{H}$  NMR (400 MHz,  $(\text{CD}_3)_2\text{CO}$ ) spectrum of compound **10**

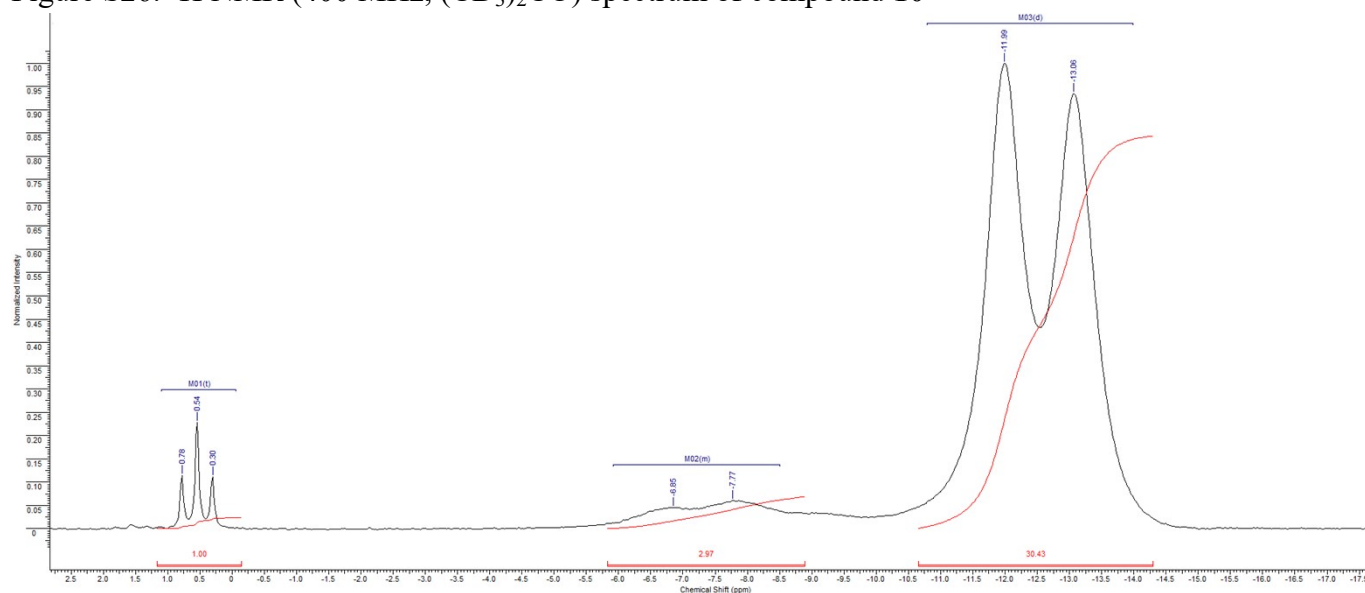

Figure S27.  $^{11}\text{B}$  NMR (128 MHz,  $(\text{CD}_3)_2\text{CO}$ ) spectrum of compound **10**

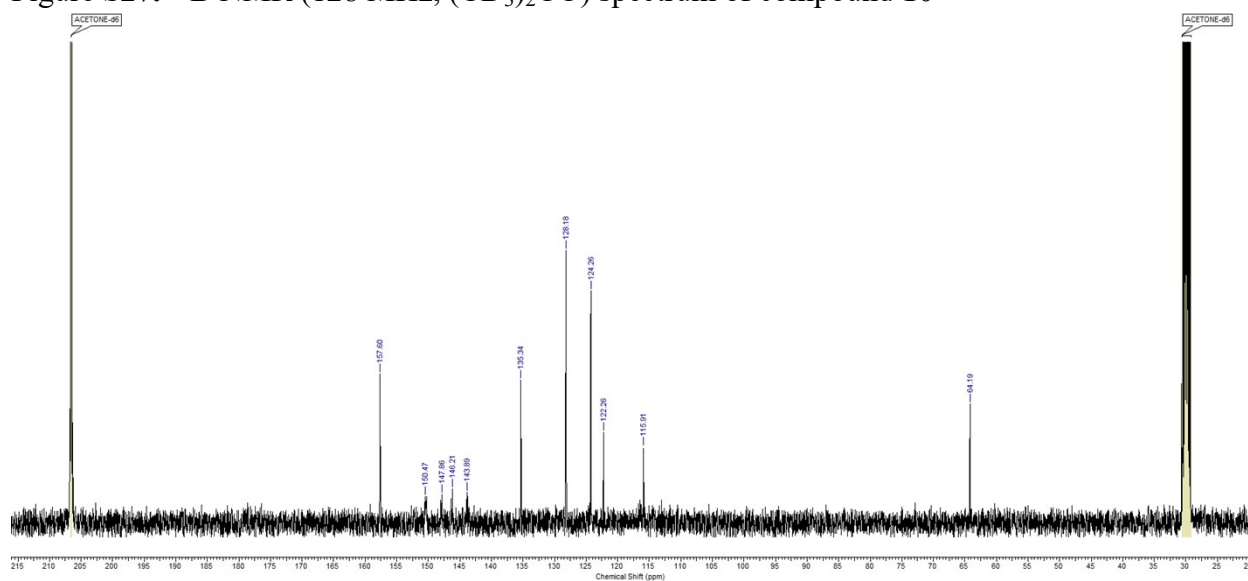

Figure S28.  $^{13}\text{C}$  NMR (100.6 MHz,  $(\text{CD}_3)_2\text{CO}$ ) spectrum of compound **10**

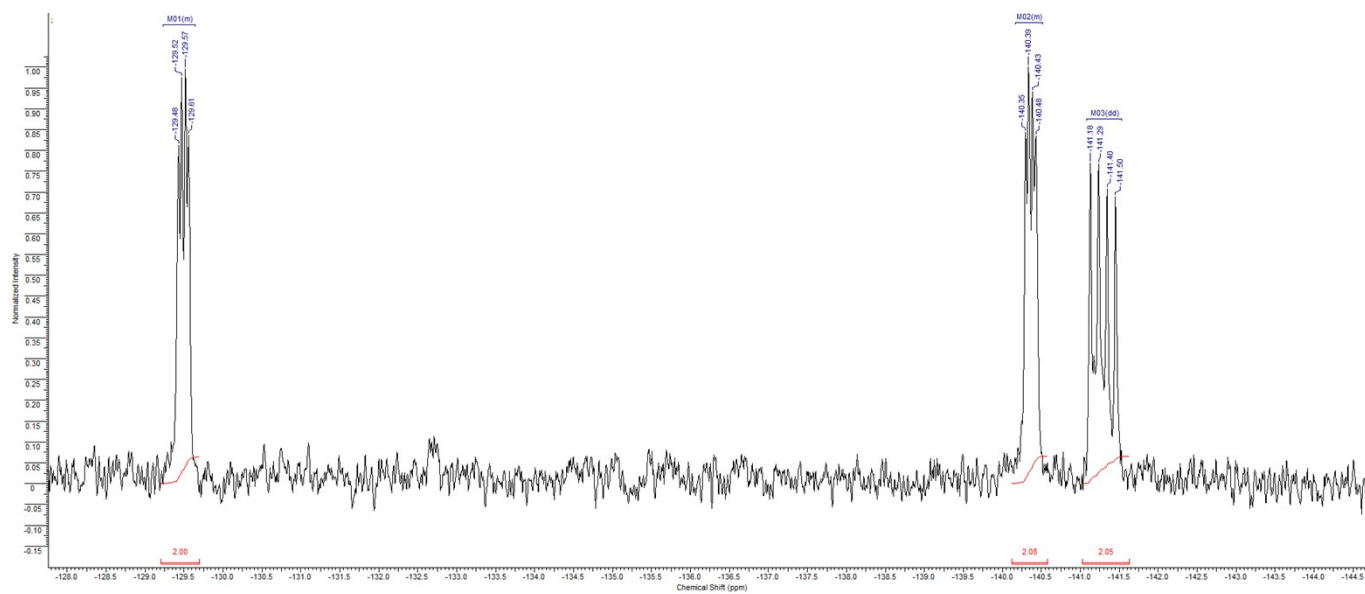

Figure S29.  $^{19}\text{F}$  NMR (282 MHz,  $(\text{CD}_3)_2\text{CO}$ ) spectrum of compound **10**

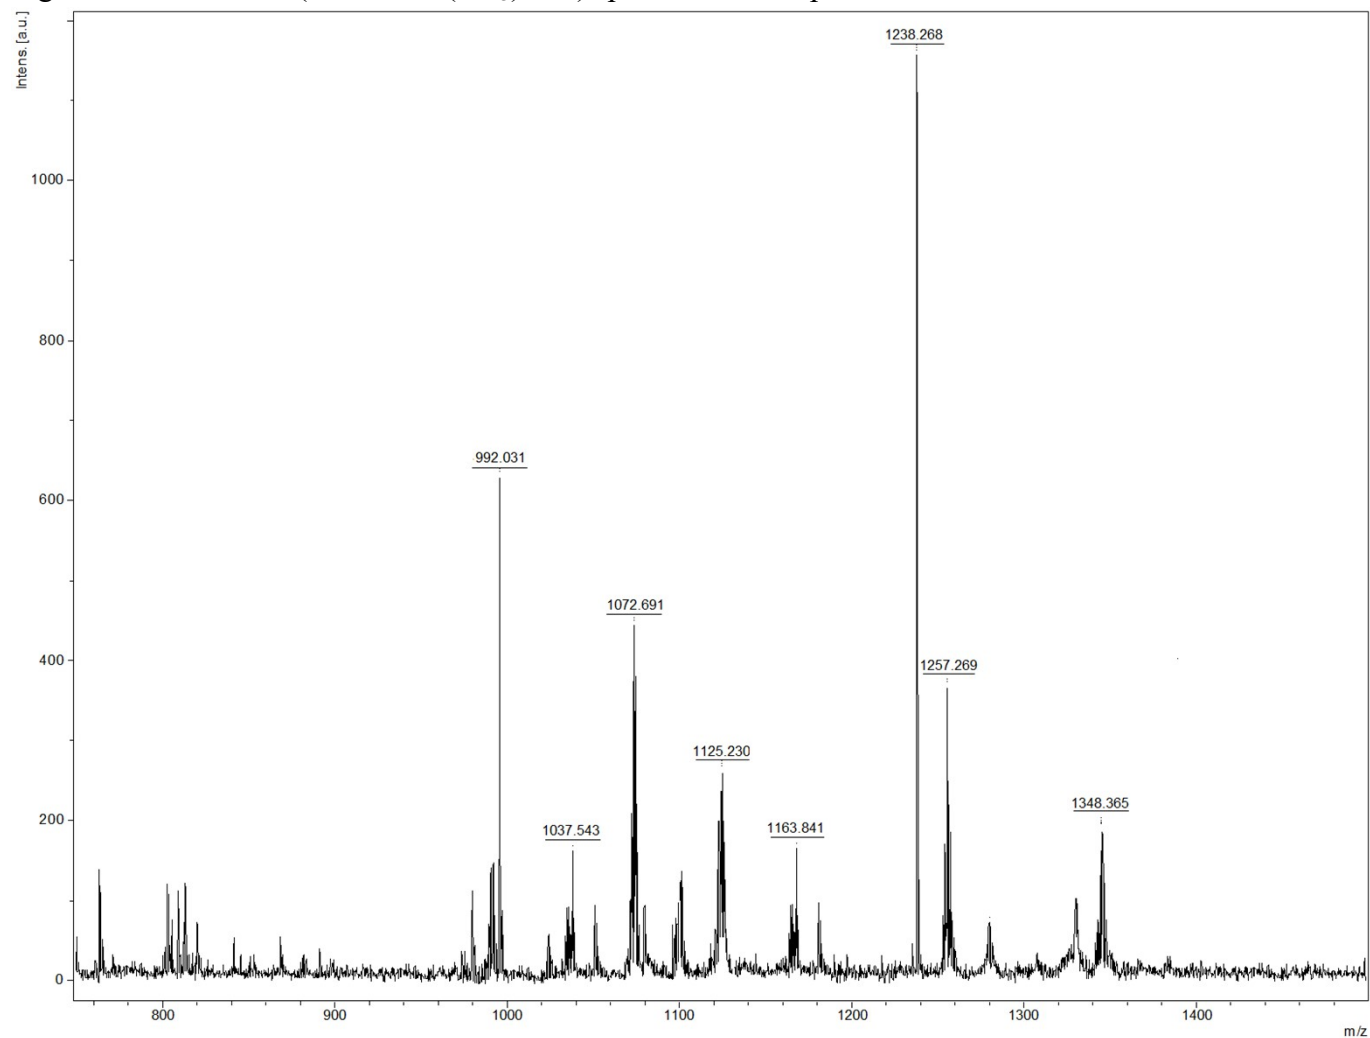

Figure S30. Mass spectrum (MALDI) of compound **10**

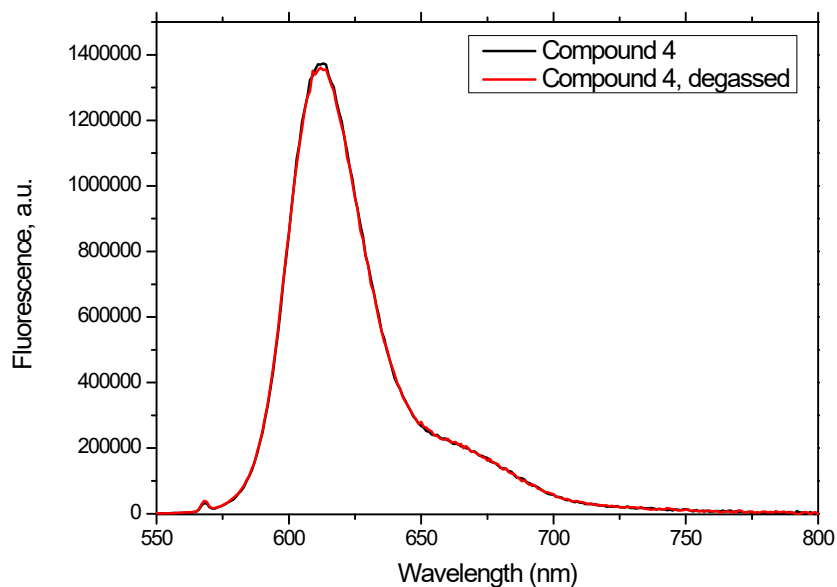

Fig. S31. Fluorescence spectra of compound **4** in air-saturated (black line) and degassed (red line) acetone solutions. Degassing of solutions in acetone was carried out by the freeze-pump-thaw method (3 cycles). Excitation at 567 nm.

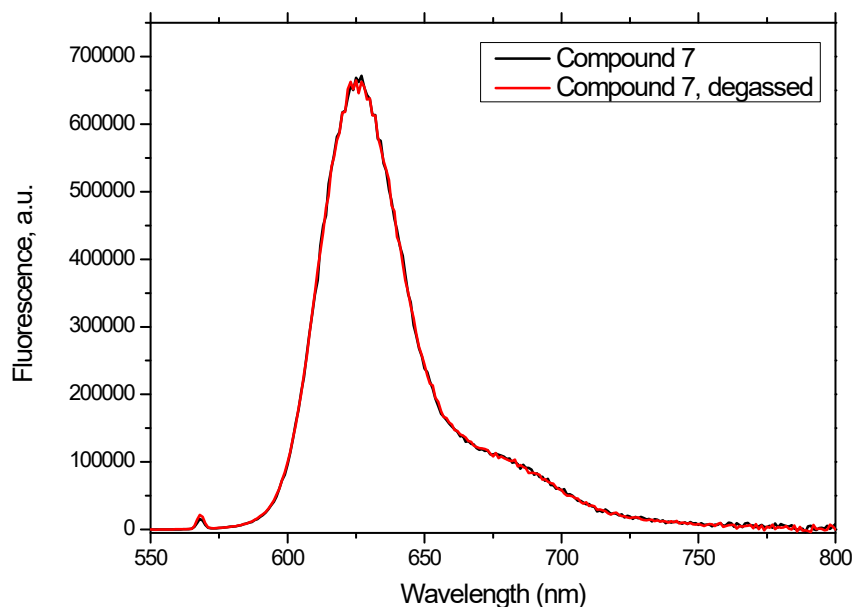

Fig. S32. Fluorescence spectra of compound **7** in air-saturated (black line) and degassed (red line) acetone solutions. Degassing of solutions in acetone was carried out by the freeze-pump-thaw method (3 cycles). Excitation at 567 nm.

Table. S1 Comparison of the experimental and theoretical interatomic distances for molecule **4**, **8**.

| Bond type       | Compound <b>4</b> |                 | Compound <b>8</b> |                 |
|-----------------|-------------------|-----------------|-------------------|-----------------|
|                 | Experiment, Å     | Calculations, Å | Experiment, Å     | Calculations, Å |
| C-N             | 1.36-1.39         | 1.34-1.38       | 1.36-1.40         | 1.34-1.39       |
| B-N             | 1.56-1.58         | 1.58            | 1.57              | 1.58            |
| B-F             | 1.38              | 1.38            | 1.36-1.38         | 1.37-1.38       |
| C-S             | 1.73              | 1.76            | 1.75              | 1.76            |
| B-S             | 1.86              | 1.88            | 1.87              | 1.88            |
| C-F             | 1.33              | 1.33            | 1.33-1.35         | 1.33            |
| B-B (carborane) | 1.69-1.78         | 1.76-1.78       | 1.69-1.77         | 1.76-1.78       |
| C-B (carborane) | 1.69-1.72         | 1.69-1.71       | 1.68-1.78         | 1.69-1.70       |
| C-H (carborane) | 1.10              | 1.08            | 1.12              | 1.08            |
